# Supplementary material for: Au-Assisted catalytic growth of Si2Te3 plates
Source: Royal Society of Chemistry journal article supplement (doi:10.1039/c9tc03769a), 2019-01-01
Supplement: c9tc03769a1.pdf [file c9tc03769a1.pdf]

Supporting information

## Au-Assisted Catalytic Growth of Si<sub>2</sub>Te<sub>3</sub> Plates

Junghyeok Kwak, Kaliannan Thiyagarajan, Anupam Giri\* and Unyong Jeong\*

Department of Materials Science and Engineering, Pohang University of Science and Technology, 77 Cheongam-Ro, Nam-Gu, Pohang 37673, Korea.

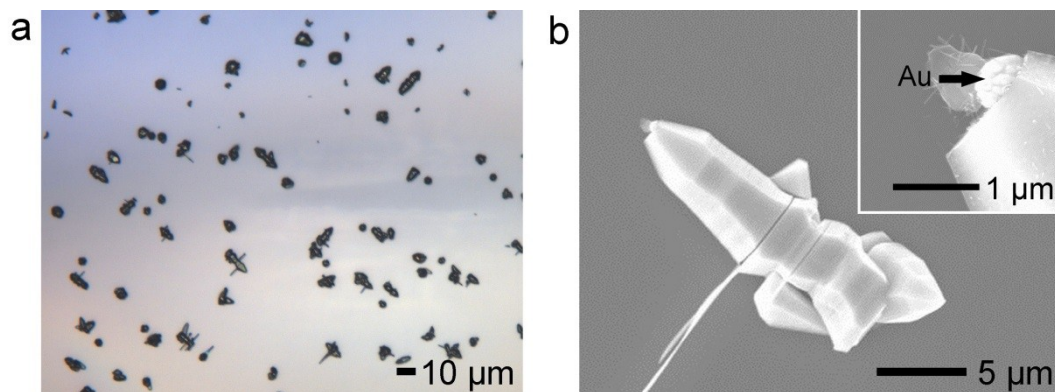

**Figure S1.** (a) OM image of Si-Te compound seeds synthesized with only ramping the reaction temperature to 750 °C without maintaining (region I). (b) SEM image of a seed with inset image of higher magnification showing Au attached at the end of the seed.

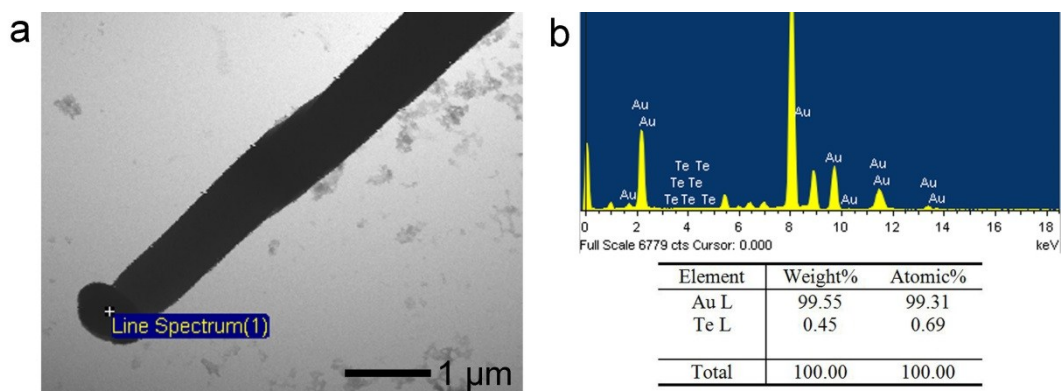

**Figure S2.** (a) TEM image of the synthesized rod at tapered tip area. (b) Point EDS result at the tip area, showing the tip is mostly Au (> 95 atomic %).
